# Supplementary material
Source: MDPI journal article supplement (https://www.mdpi.com/2227-9717/7/10/755)
Supplement: s1 [file s1]

## Supplementary Materials

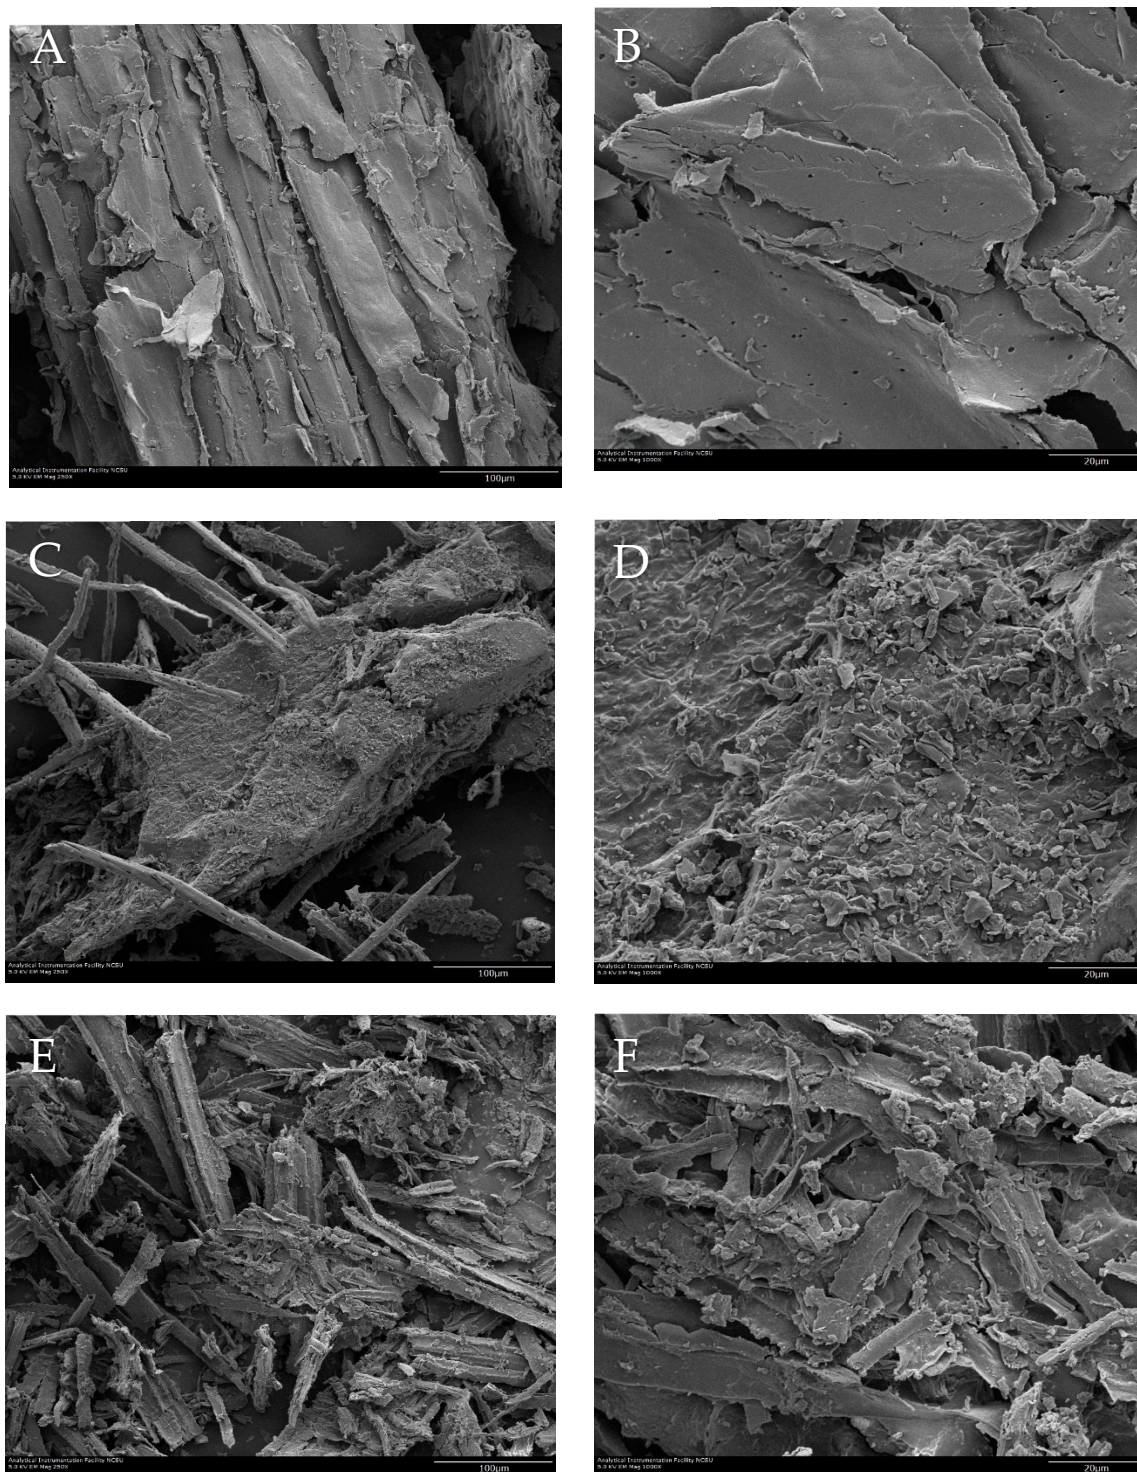

**Figure S1.** SEM images of untreated miscanthus (A and B, magnification 250× and 1000×), lignin isolated from miscanthus pretreated by 1% NaOH at 121 °C for 30 min (C and D, magnification 250× and 1000×), and lignin isolated from miscanthus pretreated by 2% H<sub>2</sub>SO<sub>4</sub> at 121°C for 60 min (E and F, magnification 250× and 1000×).
